# Supplementary material for: Seeding Propensity and Characteristics of Pathogenic αSyn Assemblies in Formalin-Fixed Human Tissue from the Enteric Nervous System, Olfactory Bulb, and Brainstem in Cases Staged for Parkinson’s Disease
Source: MDPI journal article supplement (doi:10.3390/cells10010139), 2021-01-12
Supplement: s1 [file s1]

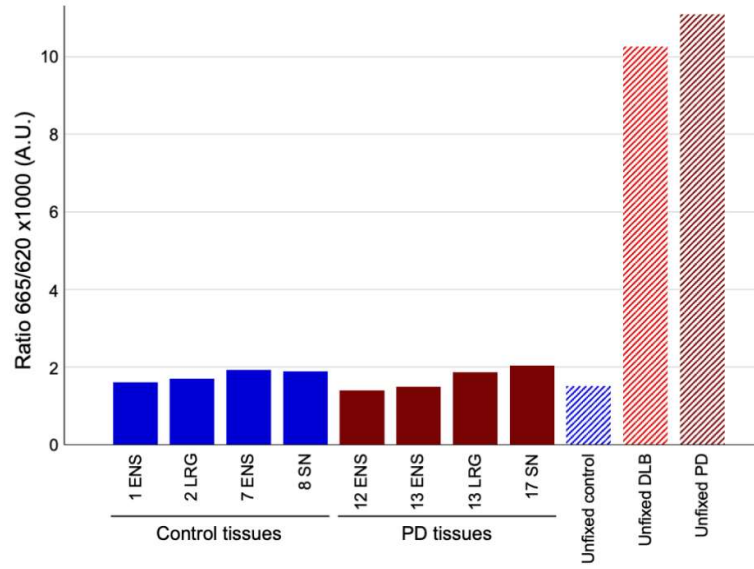

**Figure S1.** Quantification of phosphorylated  $\alpha$ Syn.

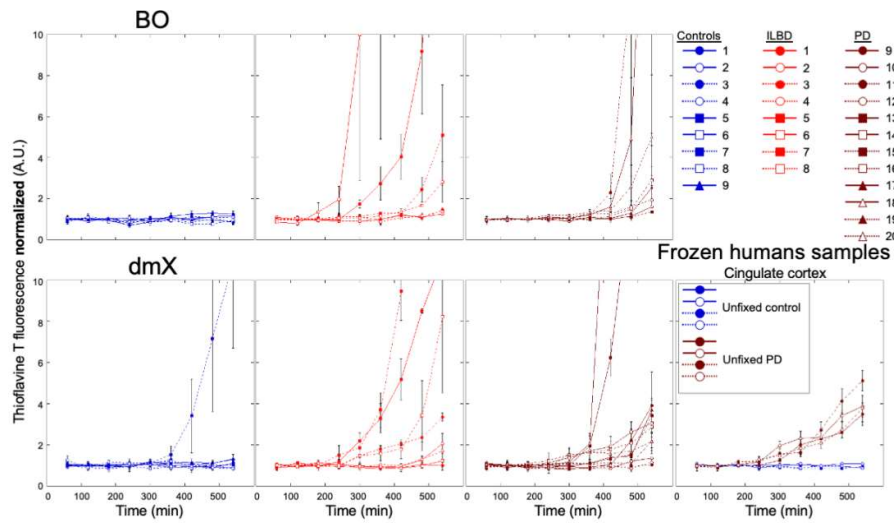

**Figure S2.** Amplification of aggregated  $\alpha$ Syn from fixed tissues by PMCA (olfactory bulb and dorsal motor nucleus of the vagus nerve).

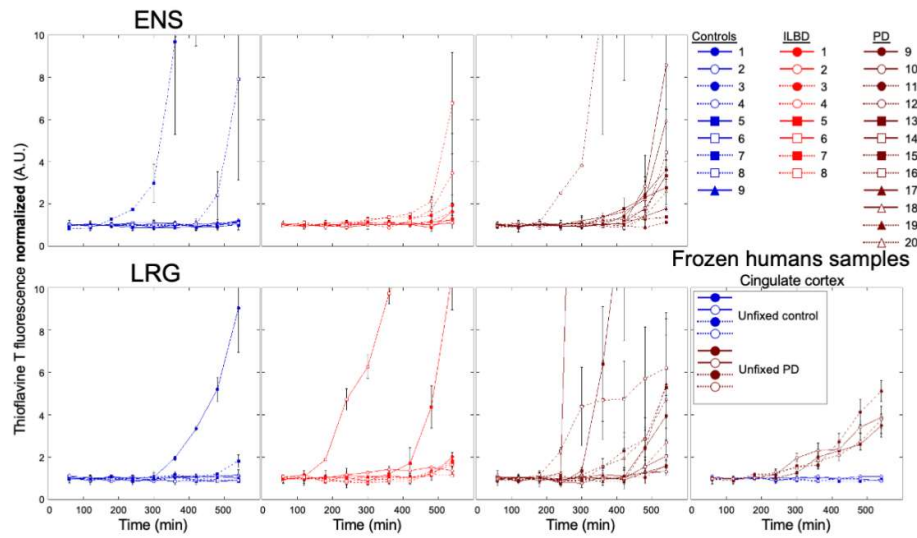

**Figure S3:** Amplification of aggregated  $\alpha$ Syn from fixed tissues by PMCA (enteric nervous system and lower raphe nuclei)

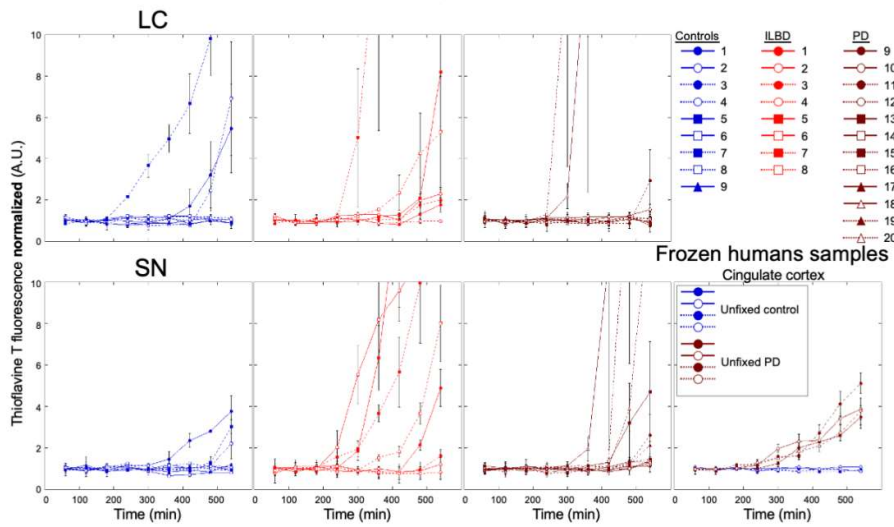

**Figure S4:** Amplification of aggregated  $\alpha$ Syn from fixed tissues by PMCA (locus coeruleus and substantia nigra, pars compacta).
